# Supplementary material
Source: publisher site journal article supplement (https://www.dovepress.com/get_supplementary_file.php?f=+400720.docx)
Supplement: Supplementary file 1 [file get_supplementary_file.php]

Supplementary material

Flat Foot in Children and Adolescents

Q1) What Is Your country of residence?
[ ] Jordan
[ ] Palestine
[ ] Syria
[ ] Egypt
[ ] Iraq

[ ] Other

Q2) What Is Your Gender?

[ ] Male

[ ] Female

Q3) Age of the patient

[ ] 0-2 years

[ ] 3-5 years

[ ] 6-10 years

[ ] 11-16 years

Q4) Does flat foot involves one or both feet :

[ ] Right foot only

[ ] Left foot only

[ ] Both feet

Q5) How was flat foot noticed ?

*You can choose more than one choice

[ ] Pain felt in the affected foot

[ ] The shape of the foot

[ ] Flat foot screening programs at schools and specialized medical centers

[ ] Discomfort wearing shoes

[ ] Wearing out of shoes

Q6) What was the age of the child when flat foot was first noticed?

[ ] 0-2 years

[ ] 3-5 years

[ ] 6-10 years

[ ] 11-16 years

Q7) If pain was present ,what part of the foot is involved ?

[ ] The inner part of foot

[ ] The outer part of foot

Q8) For how long did symptoms associated with flat foot last?

[ ] Days

[ ] Months

[ ] Multiple years

Q9) Was a doctor consulted for the patient’s flat foot ?

[ ] Yes

[ ] No

Q10) Was Xray imaging done for the patient’s foot?

[ ] Yes

[ ] No

Q11) Were you told about the patient’s flat foot type ?

[ ] Yes

[ ] No

Q12) What type of flat foot does the patient have?

[ ] Flexible

[ ] Fixed

[ ] I don’t know

Q13) Was orthosis used to treat the flat foot ?

[ ] Yes

[ ] No

Q14) If orthosis was used, who prescribed it ?

[ ] An orthopedic surgeon

[ ] A pharmacist

[ ] Medical equipment and supplies center

[ ] Relatives and friends

[ ] Complementary medicine

Q15) Were you told by the one who prescribed orthosis that flat foot is going to be corrected?

[ ] Yes

[ ] No

Q16) Was there an improvement in the symptoms after the use of orthosis ?

[ ] Yes

[ ] No

Q17) Was there an improvement in the shape of foot after the use of orthosis?

[ ] Yes

[ ] No

Q18) Does the patient seek regular medical care?

[ ] Yes

[ ] No

Q19) Did flat foot limit the patient’s ability to practice his/her daily activities?

[ ] Yes

[ ] No

Q20) Did flat foot negatively impact the patient’s physical and social activities ?

[ ] Yes

[ ] No
